# Supplementary material for: Cost-Comparison of Mechanical Thrombectomy and Catheter-Directed Thrombolysis in Intermediate-Risk Pulmonary Embolism
Source: PubMed Central journal article supplement — J Soc Cardiovasc Angiogr Interv. 2023 Oct 14;3(2):101187. doi: 10.1016/j.jscai.2023.101187 (PMC11308306; doi:10.1016/j.jscai.2023.101187), 2023-10-14
Supplement: mmc1.pdf [file mmc1.pdf]

Supplemental Table 1: Summary of Costs

| General Costs                                                |             |
|--------------------------------------------------------------|-------------|
| ICU cost per day                                             | \$11,304.00 |
| Hospital bed cost per day                                    | \$6,055.00  |
| Heparin infusion on floor per day                            | \$7.72      |
| Echocardiogram                                               | \$1,064.65  |
| Blood transfusion per unit of blood                          | \$212.00    |
| Daily laboratory tests (CBC, BMP, PTT)                       | \$139.44    |
| MT Costs                                                     |             |
| Catheterization laboratory facility fee                      | \$9,024.22  |
| MT product                                                   | \$10,000.00 |
| Gore Dry Seal sheath                                         | \$372.00    |
| 7 French sheath                                              | \$9.25      |
| Swan Ganz Catheter                                           | \$38.00     |
| Amplatz super stiff wire                                     | \$35.00     |
| Soren Dilator Kit                                            | \$165.00    |
| Mattress suture + red rubber                                 | \$6.64      |
| Perclose                                                     | \$201.00    |
| Pigtail catheter for PA gram                                 | \$8.00      |
| Berman Catheter for PA gram                                  | \$110.00    |
| Procedural Medications (fentanyl/versed, heparin, lidocaine) | \$3.76      |
| Contrast dye (1 bottle)                                      | \$14.00     |
| Micropuncture access kit                                     | \$17.95     |
| Catheterization sterile packet                               | \$20.00     |
| Ultrasound probe cover                                       | \$9.50      |
| CDT Costs                                                    |             |
| Catheterization laboratory facility fee                      | \$9,024.22  |
| Swan-Ganz catheter                                           | \$38.00     |
| 240 J wire (per side)                                        | \$17.55     |
| Sheath (per sheath)                                          | \$9.25      |
| Pigtail catheter for PA gram                                 | \$8.00      |
| t-PA cost per 10mg vial                                      | \$1,000.00  |
| t-PA cost per 50mg vial                                      | \$4067.53   |
| CM Catheter (per catheter)                                   | \$78.00     |
| EKOS Catheter (per catheter)                                 | \$2,595.00  |
| Catheterization sterile packet                               | \$20.00     |
| Micropuncture access kit                                     | \$17.95     |
| Ultrasound probe cover                                       | \$9.50      |
| Contrast Dye (per bottle)                                    | \$14.00     |

|                                                     |         |
|-----------------------------------------------------|---------|
| Procedural Medications (fentanyl/versed, lidocaine) | \$2.78  |
| X-ray day after procedure                           | \$99.84 |
| Fibrinogen laboratory value (every 8 hours)         | \$36.99 |
| Blood gas (every 8 hours)                           | \$96.24 |

---

\* Not all costs incurred by all patients
