# Supplementary material for: Cost-Comparison of Mechanical Thrombectomy and Catheter-Directed Thrombolysis in Intermediate-Risk Pulmonary Embolism
Source: PubMed Central journal article supplement — J Soc Cardiovasc Angiogr Interv. 2023 Oct 14;3(2):101187. doi: 10.1016/j.jscai.2023.101187 (PMC11308306; doi:10.1016/j.jscai.2023.101187), 2023-10-14
Supplement: mmc2.pdf [file mmc2.pdf]

Supplemental Table 2: Model Adjusted Cost Difference per Institution at Quartiles

|            | All           | All           | All           | All           | All           |
|------------|---------------|---------------|---------------|---------------|---------------|
| Timepoint  | First         | Q1            | Median        | Q3            | Last          |
| CDT Months | 10            | 42            | 59            | 71            | 104           |
| MT Months  | 41            | 77            | 86            | 95            | 104           |
| Cost Diff  | \$11,983      | \$9,534       | \$7,149       | \$5,771       | \$1,038       |
| LB         | -\$3,736      | \$3,094       | \$1,583       | -\$908        | -\$9,538      |
| UB         | \$27,703      | \$15,974      | \$12,716      | \$12,449      | \$11,614      |
|            | Institution 1 |
| Timepoint  | First         | Q1            | Median        | Q3            | Last          |
| CDT Months | 10            | 39            | 60            | 75            | 87            |
| MT Months  | 43            | 64            | 80            | 88            | 93            |
| Cost Diff  | \$8,108       | \$6,200       | \$5,036       | \$3,792       | \$2,651       |
| LB         | -\$11,124     | -\$3,580      | -\$2,793      | -\$5,941      | -\$9,158      |
| UB         | \$27,340      | \$15,980      | \$12,864      | \$13,525      | \$14,460      |
|            | Institution 2 |
| Timepoint  | First         | Q1            | Median        | Q3            | Last          |
| CDT Months | 30            | 50            | 61.5          | 70            | 104           |
| MT Months  | 47            | 84            | 94.5          | 98            | 104           |
| Cost Diff  | \$28,261      | \$14,393      | \$8,457       | \$4,980       | -\$6,383      |
| LB         | \$5,846       | \$4,758       | \$216         | -\$4,019      | -\$21,594     |
| UB         | \$50,675      | \$24,029      | \$16,699      | \$13,979      | \$8,828       |
|            | Institution 3 |
| Timepoint  | First         | Q1            | Median        | Q3            | Last          |
| CDT Months | 20            | 35            | 49            | 60            | 101           |
| MT Months  | 41            | 72            | 86            | 96            | 102           |
| Cost Diff  | -\$26,176     | -\$6,101      | \$2,139       | \$7,674       | \$12,690      |
| LB         | -\$60,997     | -\$21,363     | -\$10,703     | -\$7,487      | -\$14,996     |
| UB         | \$8,645       | \$9,161       | \$14,981      | \$22,836      | \$40,375      |

Months refer to the number of months since study start date. We present the cost differences between treatments at the respective institutional and treatment time points along with their respective confidence interval lower and upper bounds. LB = Lower bound of range. UB = Upper bound of range.
